# Supplementary material for: Genomic analysis and clinical implications of immune cell infiltration in gastric cancer
Source: PubMed Central journal article supplement (PMC7240200; doi:10.1042/bsr20193308), 2020-05-20
Supplement: BSR-2019-3308_supp.pdf [file BSR-2019-3308_supp.pdf]

A: Total Samples

B: Normal Samples

C: Tumor Samples

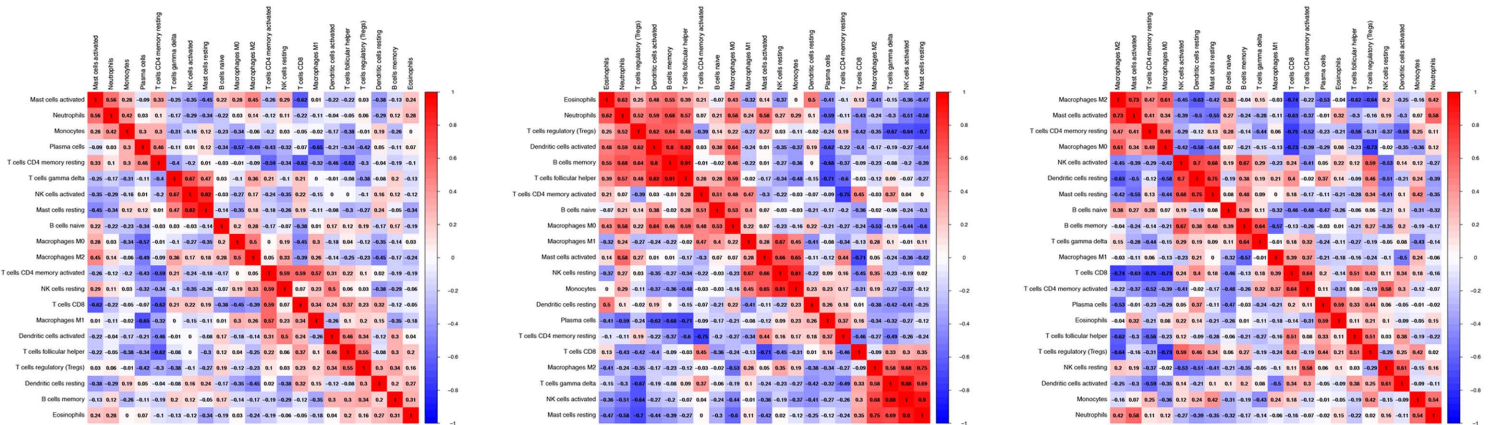

**Supplementary Figure 1** Correlation matrix of all 22 immune proportions and immune cytolytic activity in the TCGA GC cohort, including total samples (**A**), normal samples (**B**) and tumor samples (**C**).

**A**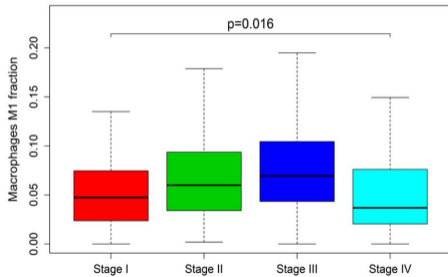**B**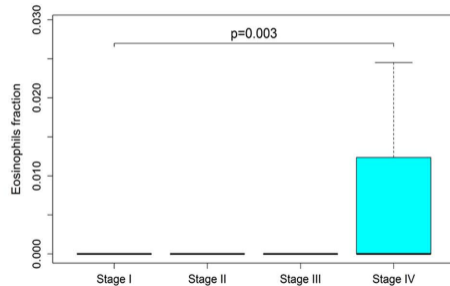**C**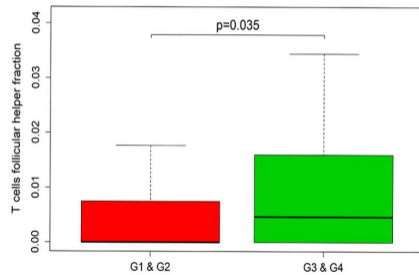

**Supplementary Figure 2** Box plot depicting the correlation between several LM22 immune cells and GC classification based the distribution of CIBERSORT *P*-value. **A-B.** M1 macrophages and eosinophils in the pathological stage. **C.** follicular helper T cells at the late stage (G3/G4).

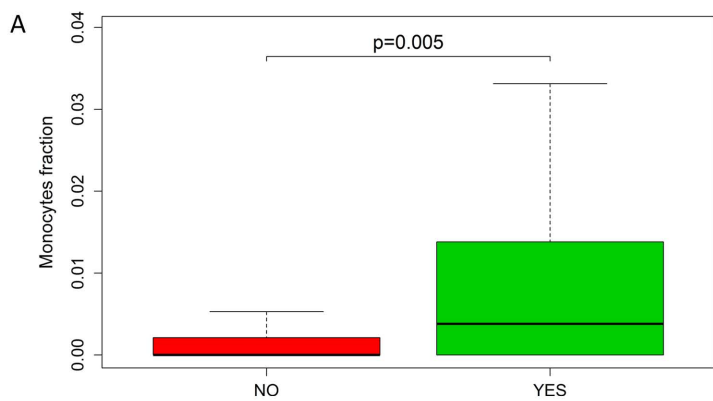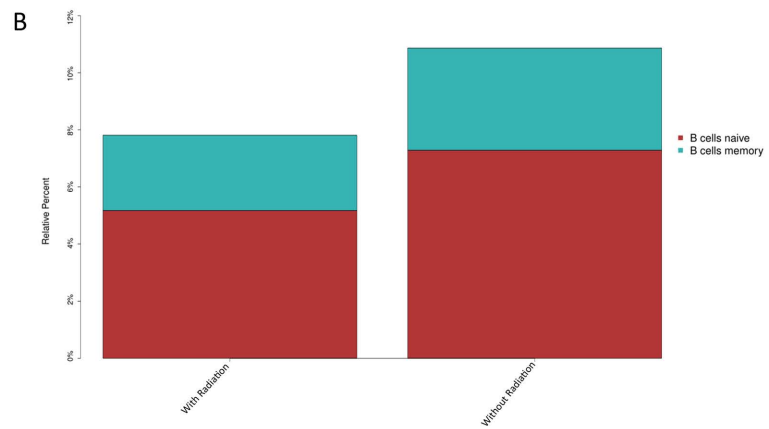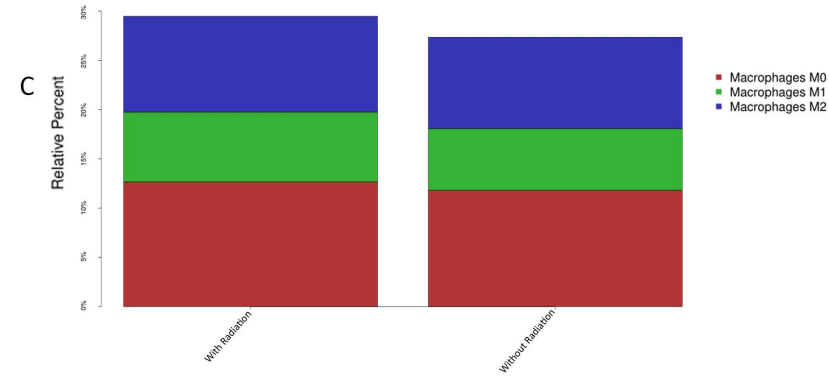

**Supplementary Figure 3** The difference of immune infiltration between GC with radiation therapy and without radiation therapy samples. **A.** Box plot of the distribution of CIBERSORT *P* value for monocytes. **B-C.** The total difference in total B cells and total macrophages, respectively.

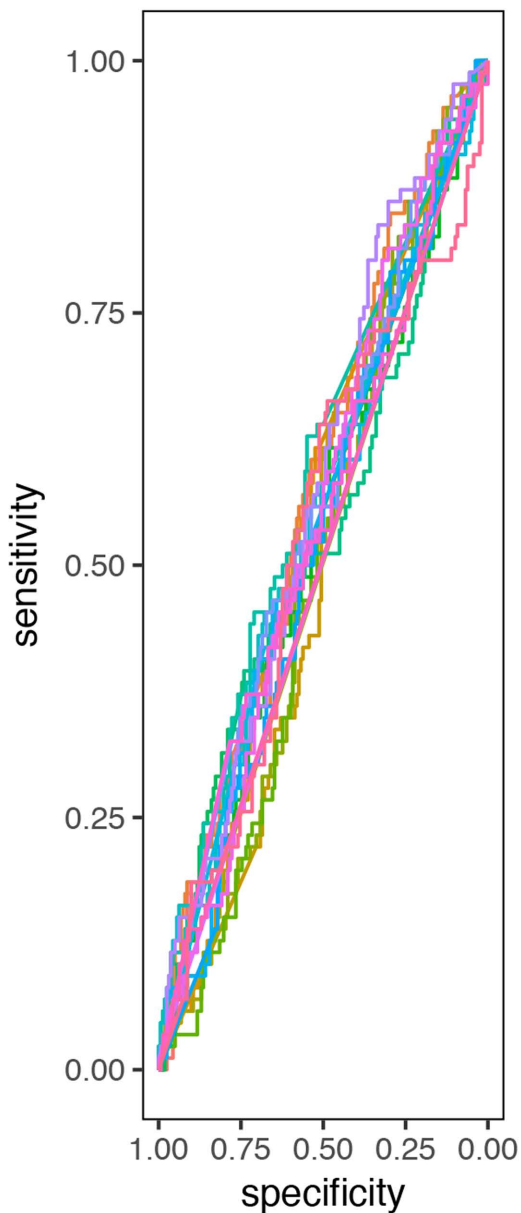

name

- |                                                                                   |                           |                                                                                    |                              |
|-----------------------------------------------------------------------------------|---------------------------|------------------------------------------------------------------------------------|------------------------------|
|  | B cells memory            |  | Neutrophils                  |
|  | B cells naive             |  | NK cells activated           |
|  | Dendritic cells activated |  | NK cells resting             |
|  | Dendritic cells resting   |  | Plasma cells                 |
|  | Eosinophils               |  | T cells CD4 memory activated |
|  | Macrophages M0            |  | T cells CD4 memory resting   |
|  | Macrophages M1            |  | T cells CD4 naive            |
|  | Macrophages M2            |  | T cells CD8                  |
|  | Mast cells activated      |  | T cells follicular helper    |
|  | Mast cells resting        |  | T cells gamma delta          |
|  | Monocytes                 |  | T cells regulatory (Tregs)   |

**Supplementary Figure 4** AUC curves of biomarkers prognostic model built by LM22 immune cell subsets.



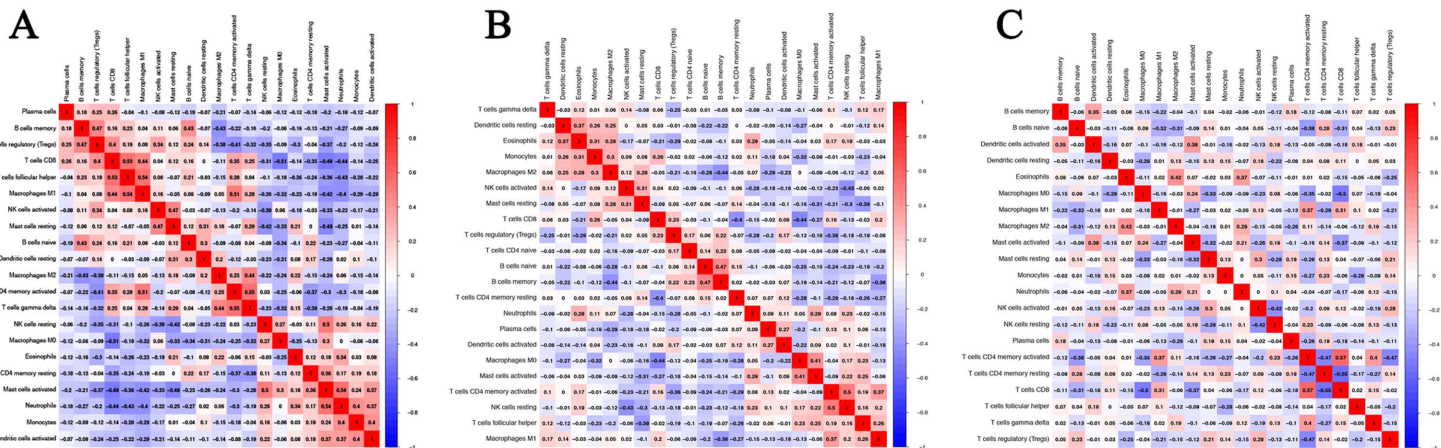

**Supplementary Figure 5** The cluster counts evaluated. (A) consensus heatmap (B) CDF curve of  $K=2-5$ . (C) The relative change in area under the CDF curve of  $K=2-5$ .

A

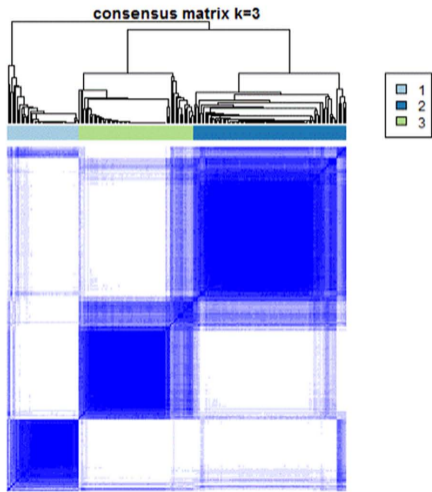

B

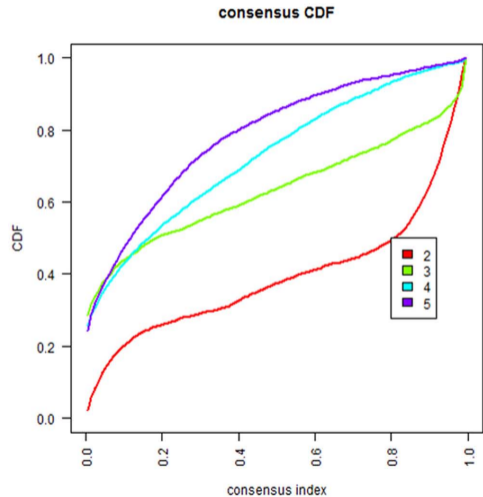

C

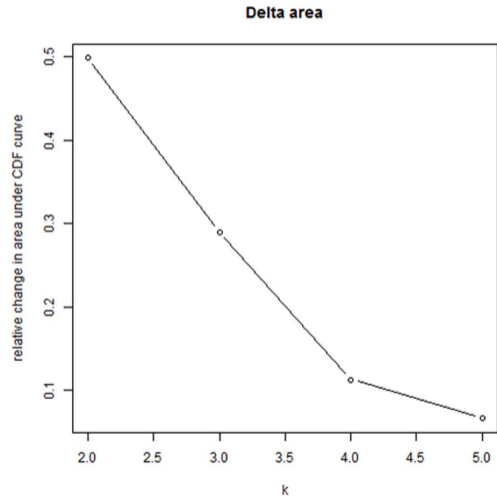

**Supplementary Figure 6** Heatmap of 22 immune cells and clusters. **A-C** is for the correlation matrix of the 22 immune cells proportions in cluster I - III, respectively. **D**. Heatmap of the 22 immune cells proportions.
